# Supplementary material
Source: PubMed Central journal article supplement (PMC3500551)
Supplement: NIHMS418154-supplement-Appendix.pdf [file NIHMS418154-supplement-Appendix.pdf]

Jacobs BL, Zhang Y, Skolarus TA, Hollenbeck BK. Growth of high-cost intensity-modulated radiotherapy for prostate cancer raises concerns about overuse. Health Aff (Millwood). 2012;31(4).

#### Appendix A. Codes used to identify the study cohort

| Radiation type                            | HCPCS code                                                                                |
|-------------------------------------------|-------------------------------------------------------------------------------------------|
| 3-dimensional conformal therapy planning* | 77295 or 77290 and 76370 or 77290 and 77014                                               |
| 3-dimensional conformal therapy treatment | 77401, 77402, 77403, 77404, 77406, 77407, 77408, 77409, 77411, 77412, 77413, 77414, 77416 |
| IMRT treatment                            | 77418, 0073T, or G0174                                                                    |

**Source:** Authors' analysis of linked Surveillance, Epidemiology, and End Results (SEER)-Medicare data.

**Notes:** \*There are not specific treatment codes for 3-dimensional conformal therapy, which necessitates the use of planning codes. HCPCS is Healthcare Common Procedure Coding System.

Appendix B. Tumor grade and stage characteristics of the study population

| Characteristics                   | 2001               |                 | 2004               |                  | 2007              |                  |
|-----------------------------------|--------------------|-----------------|--------------------|------------------|-------------------|------------------|
|                                   | 3D-CRT<br>(n=4874) | IMRT<br>(n=401) | 3D-CRT<br>(n=1973) | IMRT<br>(n=3052) | 3D-CRT<br>(n=579) | IMRT<br>(n=4842) |
| <b>Tumor grade<sup>§</sup></b>    |                    |                 |                    |                  |                   |                  |
| Well/moderately differentiated    | 3520 (72)          | 282 (70)        | 687 (35)           | 1317 (43)****    | 133 (23)          | 1747 (36)****    |
| Poorly/undifferentiated           | 1240 (25)          | 111 (28)        | 1265 (64)          | 1696 (56)        | 424 (73)          | 3057 (63)        |
| <b>Clinical stage<sup>†</sup></b> |                    |                 |                    |                  |                   |                  |
| T1                                | 1758 (36)          | 169 (42)**      | 880 (45)           | 1478 (48)**      | 278 (48)          | 2566 (53)****    |
| T2                                | 2839 (58)          | 205 (51)        | 936 (47)           | 1383 (45)        | 223 (39)          | 1941 (40)        |
| T3/T4                             | 190 (4)            | 15 (4)          | 119 (6)            | 142 (5)          | 51 (8)            | 242 (6)          |

**Source:** Authors' analysis of linked Surveillance, Epidemiology, and End Results (SEER)-Medicare data.

**Notes:** Data are presented as number (percent). Typically, less differentiated and higher stage tumors have a worse prognosis due to the aggressiveness of disease. IMRT is intensity-modulated radiotherapy. 3D-CRT is 3-dimensional conformal therapy. Chi-square tests were performed for all categorical variables. <sup>§</sup>In all, 242 cases with unknown tumor grade. <sup>†</sup>In all, 306 cases with unknown clinical stage. Percentages might not sum to 100 because of rounding. \*\*p<0.05 \*\*\*p<0.01 \*\*\*\*p<0.001

## Appendix C.

Adjusted percentage of receiving IMRT compared to other radiation treatments, according to socioeconomic status

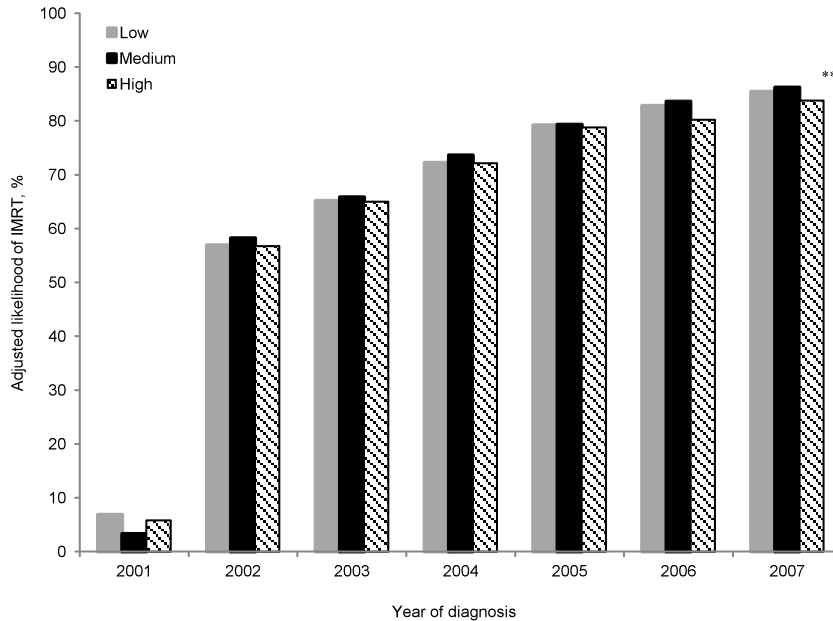

**Source:** Authors' analysis of linked Surveillance, Epidemiology, and End Results (SEER)-Medicare data.

**Notes:** The likelihood of IMRT utilization compared to 3-dimensional conformal therapy, 2-dimensional external beam radiotherapy, or brachytherapy was fairly uniform across all socioeconomic classes. IMRT is intensity-modulated radiotherapy. Model was adjusted for age, race, comorbidity, and tumor grade and stage. \*\* $p < 0.001$ , omnibus Wald test
